# Supplementary material for: Cellular Therapies in Trauma and Critical Care Medicine: Forging New Frontiers
Source: PubMed Central journal article supplement — Shock. 2015 Nov 15;44(6):505–23. doi: 10.1097/SHK.0000000000000482 (PMC4851225; doi:10.1097/shk.0000000000000482), 2015-11-15
Supplement: shk-44-505-s001.pdf [file shk-44-505-s001.pdf]

**Supplementary Table 1.** Cellular Therapies in Traumatic Brain Injury and Spinal Cord Injury Clinical Trials

| Official Title                                                                                                                                                                                                                    | ClinicalTrials.gov Identifier | Status                                                                                                  | Phase   | Target Enrollment | Ages                 | Cell Type                           | Route of Administration                  | Primary Outcome Measure                                                                                                                                           | Sponsor                                                |
|-----------------------------------------------------------------------------------------------------------------------------------------------------------------------------------------------------------------------------------|-------------------------------|---------------------------------------------------------------------------------------------------------|---------|-------------------|----------------------|-------------------------------------|------------------------------------------|-------------------------------------------------------------------------------------------------------------------------------------------------------------------|--------------------------------------------------------|
| Autologous Bone Marrow Derived Cell Transplant in Spinal Cord Injury Patients                                                                                                                                                     | NCT00816803                   | This study has been completed.                                                                          | I, II   | 80                | 10 to 36 years       | Autologous bone marrow derived cell | N/A                                      | Safety as measured by absence of neuronal changes, infections or increased intracranial tension, and monitoring for any abnormal growth or tumor formation by MRI | Cairo University, Egypt                                |
| Autologous Bone Marrow Mononuclear Cell Therapy for Spinal Cord Injury                                                                                                                                                            | NCT02027246                   | This study has been completed.                                                                          | I       | 166               | 8 months to 63 years | BMMNC                               | N/A                                      | Change in clinical symptoms                                                                                                                                       | Neurogen Brain and Spine Institute, India              |
| Autologous Mesenchymal Stem Cells in Spinal Cord Injury Patients                                                                                                                                                                  | NCT01694927                   | This study is enrolling participants by invitation only.                                                | II      | 30                | 2 to 65 years        | MSC                                 | Intralesional                            | Safety                                                                                                                                                            | Clínica Las Condes. Chile                              |
| A Double-Blind, Controlled Phase 2 Study of the Safety and Efficacy of Modified Stem Cells (SB623) in Patients With Chronic Motor Deficit From Traumatic Brain Injury                                                             | NCT02416492                   | This study is not yet open for participant recruitment.                                                 | II      | 52                | 18 to 75 years       | SB623 cells                         | Surgical implantation                    | Change in Fugl-Meyer Motor Scale                                                                                                                                  | SanBio, Inc., USA                                      |
| A Phase 1, Open-label, Single-site, Safety Study of Human Spinal Cord-derived Neural Stem Cell Transplantation for the Treatment of Chronic SCI                                                                                   | NCT01772810                   | This study is currently recruiting participants.                                                        | I       | 4                 | 18 to 65 years       | HSSC                                | Surgical implantation                    | Incidence of adverse events                                                                                                                                       | Neuralstem Inc., USA                                   |
| A Phase I/II Study of the Safety and Preliminary Efficacy of Intramedullary Spinal Cord Transplantation of Human Central Nervous System Stem Cells (HuCNS-SC <sup>®</sup> ) in Subjects With Thoracic (T2-T11) Spinal Cord Trauma | NCT01321333                   | This study has been completed.                                                                          | I, II   | 12                | 18 to 60 years       | HuCNS-SC <sup>®</sup>               | Intramedullary                           | Incidence/types of adverse events                                                                                                                                 | StemCells, Inc., USA                                   |
| A Phase II Study of Transplantation of Autologous Adipose Derived Stem Cells in Completely Acute Spinal Cord Injury                                                                                                               | NCT02034669                   | This study is currently recruiting participants.                                                        | I, II   | 48                | 19 to 60 years       | ADSCs                               | Intradural and intrathecal injection, IV | Incidence of adverse events                                                                                                                                       | Tri Phuoc Biotechnology., JSC, Vietnam                 |
| A Phase II/III Clinical Trial to Evaluate the Safety and Efficacy of Bone Marrow-derived Mesenchymal Stem Cell Transplantation in Patients With Chronic Spinal Cord Injury                                                        | NCT01676441                   | This study is currently recruiting participants.                                                        | II, III | 32                | 16 to 65 years       | MSC                                 | Intramedullary and intrathecal injection | Motor Score of the American Spinal Injury Association (ASIA) scale scores                                                                                         | Pharmicell Co., Ltd., South Korea                      |
| A Single-Blind, Randomized, Parallel Arm, Phase II Proof-of-Concept Study of the Safety and Efficacy of Human Central Nervous System Stem Cells Transplantation in Cervical Spinal Cord Injury                                    | NCT02163876                   | This study is currently recruiting participants.                                                        | II      | 50                | 18 to 60 years       | HuCNS-SC                            | Intramedullary transplantation           | Change from baseline in ISNCSCI upper extremity motor scores                                                                                                      | StemCells, Inc., USA                                   |
| Different Efficacy Between Rehabilitation Therapy and Umbilical Cord Derived Mesenchymal Stem Cells Transplantation in Patients With Chronic Spinal Cord Injury in China                                                          | NCT01873547                   | The recruitment status of this study is unknown because the information has not been verified recently. | III     | 300               | 20 to 65 years       | UC-MSC                              | Intrathecal injection                    | Neurological Function Score (i.e., ASIA and Barthel Index)                                                                                                        | General Hospital of Chinese Armed Police Forces, China |
| Efficacy Difference Between Rehabilitation Therapy and Umbilical Cord Derived Mesenchymal Stem Cells Transplantation in Patients With Acute or Chronic Spinal Cord Injury in China                                                | NCT01393977                   | The recruitment status of this study is unknown because the information has                             | II      | 60                | 20 to 50 years       | UC-MSC                              | N/A                                      | Electromyogram and electroneurophysiologic test results                                                                                                           | General Hospital of Chinese Armed Police Forces, China |

|                                                                                                                                                                                                            |             |                                                                                                         |       |     |                       |                                                    |                                             |                                                                         |                                                                                 |
|------------------------------------------------------------------------------------------------------------------------------------------------------------------------------------------------------------|-------------|---------------------------------------------------------------------------------------------------------|-------|-----|-----------------------|----------------------------------------------------|---------------------------------------------|-------------------------------------------------------------------------|---------------------------------------------------------------------------------|
|                                                                                                                                                                                                            |             | not been verified recently.                                                                             |       |     |                       |                                                    |                                             |                                                                         |                                                                                 |
| Evaluation of Autologous Mesenchymal Stem Cell Transplantation in Chronic Spinal Cord Injury: a Pilot Study                                                                                                | NCT02152657 | This study is currently recruiting participants.                                                        | I, II | 5   | 18 to 65 years        | MSC                                                | Percutaneous injection                      | Adverse events as detected by MRI, laboratorial, and radiological exams | Hospital Sao Rafael, Brazil                                                     |
| Long-term Follow-up Study of the Phase I/II Safety and Preliminary Efficacy Investigation of Intramedullary Spinal Cord Transplantation of HuCNS-SC® in Subjects With Thoracic (T2-T11) Spinal Cord Trauma | NCT01725880 | This study is enrolling participants by invitation only.                                                | N/A   | 12  | 18 to 65 years        | HuCNS-SC                                           | Intramedullary                              | ASIA Impairment Scale scores                                            | StemCells, Inc., USA                                                            |
| Open Label Study of Autologous Bone Marrow Mononuclear Cells in Spinal Cord Injury                                                                                                                         | NCT02009124 | This study is currently recruiting participants.                                                        | II    | 500 | 12 months to 65 years | BMMNC                                              | Intrathecal injection                       | Change in clinical symptoms of spinal cord injury after 6 months        | Neurogen Brain and Spine Institute, India                                       |
| Open Label Study of Autologous Bone Marrow Mononuclear Cells in Traumatic Brain Injury                                                                                                                     | NCT02028104 | This study is currently recruiting participants.                                                        | I     | 50  | 6 months to 65 years  | BMMNC                                              | N/A                                         | Change in clinical symptoms of TBI                                      | Neurogen Brain and Spine Institute, India                                       |
| Phase I Pilot Study to Evaluate the Security of Local Administration of Autologous Stem Cells Obtained From the Bone Marrow Stroma, in Traumatic Injuries of the Spinal Cord                               | NCT01909154 | This study has been completed.                                                                          | I     | 12  | 18 to 60 years        | BMStC                                              | Intermedular, subarachnoid, and intrathecal | Incidence of adverse events                                             | Puerta de Hierro University Hospital, Spain                                     |
| Phase I, Single Center, Trial to Asses Safety and Tolerability of the Intrathecal Infusion of Ex-vivo Expanded Bone-marrow Derived Mesenchymal Stem Cells for the Treatment of Spinal Cord Injury          | NCT01162915 | This study has suspended participant recruitment.                                                       | I     | 10  | 18 to 65 years        | BMMSC                                              | Intrathecal injection                       | Safety evaluation                                                       | TCA Cellular Therapy, LLC, USA                                                  |
| Phase 1 Study of Autologous Bone Marrow Stem Cell Transplantation in Patients With Spinal Cord Injury                                                                                                      | NCT01325103 | This study has been completed.                                                                          | I     | 20  | 18 to 50 years        | BMMSC                                              | Transplantation into the lesion area        | Feasibility and safety                                                  | Hospital Sao Rafael, Brazil                                                     |
| Phase I/II Trial of Autologous Bone Marrow Derived Mesenchymal Stem Cells to Patients With Spinal Cord Injury                                                                                              | NCT01446640 | The recruitment status of this study is unknown because the information has not been verified recently. | I, II | 20  | 16 to 60 Years        | BMMSC                                              | IV and intrathecal                          | Incidence of adverse events                                             | Guangzhou General Hospital of Guangzhou Military Command, China                 |
| Phase 2 Trial of Pediatric Autologous Bone Marrow Mononuclear Cells for Severe Traumatic Brain Injury                                                                                                      | NCT01851083 | This study is currently recruiting participants.                                                        | I/II  | 50  | 5 to 17 years         | BMMNC                                              | IV                                          | White and gray matter structural preservation on DTMRI                  | The University of Texas Health Science Center, USA                              |
| Safety and Effect of Adipose Tissue Derived Mesenchymal Stem Cell Implantation in Patients With Spinal Cord Injury                                                                                         | NCT01769872 | This study is currently recruiting participants.                                                        | I, II | 15  | 19 to 70 years        | ADSC                                               | Intrathecal                                 | ASIA scores                                                             | K-Stemcell Co Ltd, South Korea                                                  |
| Safety and Efficacy of Autologous Neural Stem Cell Transplantation in Patients With Traumatic Spinal Cord Injury                                                                                           | NCT02326662 | This study is currently recruiting participants.                                                        | I, II | 30  | 18 to 50 years        | MSC-derived NSC + 3D matrix as needed              | Intraspinal and intrathecal injection       | Incidence of adverse events                                             | Federal Research Clinical Center of Federal Medical & Biological Agency, Russia |
| Safety and Efficacy of Nerve Regeneration-guided Collagen Scaffold Combined With Mesenchymal Stem Cells Transplantation in Spinal Cord Injury Patients                                                     | NCT02352077 | This study is currently recruiting participants.                                                        | I     | 30  | 18 to 65 years        | Nerve regeneration -guided collagen scaffold + MSC | N/A                                         | Incidence of adverse events                                             | Chinese Academy of Sciences, China                                              |

|                                                                                                                                                                                                                   |             |                                                                                                         |       |    |                |                     |                                                                                      |                                                                                                             |                                                              |
|-------------------------------------------------------------------------------------------------------------------------------------------------------------------------------------------------------------------|-------------|---------------------------------------------------------------------------------------------------------|-------|----|----------------|---------------------|--------------------------------------------------------------------------------------|-------------------------------------------------------------------------------------------------------------|--------------------------------------------------------------|
| Safety and Feasibility Study of Cell Therapy in Treatment of Spinal Cord Injury                                                                                                                                   | NCT02237547 | This study is currently recruiting participants.                                                        | I, II | 20 | 18 to 50 years | UC-MSC and BMMNC    | Intrathecal and IV                                                                   | Incidence of adverse events                                                                                 | Translational Biosciences, Rep. of Panama                    |
| Safety of Autologous Adipose Derived Mesenchymal Stem Cells in Patients With Spinal Cord Injury                                                                                                                   | NCT01274975 | This study has been completed.                                                                          | I     | 8  | 19 to 60 years | AdMSCs (Astrostem®) | IV                                                                                   | Safety evaluation                                                                                           | K-Stemcell Co Ltd., South Korea                              |
| Safety of Autologous Stem Cell Treatment for Spinal Cord Injury in Children                                                                                                                                       | NCT01328860 | This study has been terminated.                                                                         | I     | 10 | 1 to 15 years  | BMPC                | IV                                                                                   | ASIA - Standard Neurological Classification of Spinal Cord Injury scores                                    | James E. Baumgartner, MD, USA                                |
| Safety of Autologous Stem Cell Treatment for Traumatic Brain Injury in Children                                                                                                                                   | NCT00254722 | This study has been completed.                                                                          | I     | 10 | 5 to 14 years  | BMPC                | IV                                                                                   | Neurological events and infectious morbidity                                                                | The University of Texas Health Science Center, USA           |
| Study the Safety and Efficacy of Bone Marrow Derived Autologous Cells for the Treatment of Spinal Cord Injury. It is Self Funded (Patients' Own Funding) Clinical Trial                                           | NCT01833975 | This study is currently recruiting participants.                                                        | I, II | 50 | 18 to 55 years | BMMNC               | Intrathecal injection                                                                | Improvement in overall sensory for motor control using Frankel score                                        | Chaitanya Hospital, India                                    |
| Surgical Transplantation of Autologous Bone Marrow Stem Cells With Glial Scar Resection for Patients of Chronic Spinal Cord Injury and Intra-thecal Injection for Acute and Subacute Injury - A Preliminary Study | NCT01186679 | This study has been completed.                                                                          | I, II | 12 | 20 to 55 years | BMSC                | N/A                                                                                  | Incidence of adverse events                                                                                 | International Stemcell Services Limited, India               |
| The Effect of Intrathecal Transplantation of Autologous Adipose Tissue Derived Mesenchymal Stem Cells in the Patients With Spinal Cord Injury, Phase I Clinical Study                                             | NCT01624779 | This study has been completed.                                                                          | I     | 15 | 19 to 70 years | AdMSCs              | Intrathecal injection                                                                | MRI changes                                                                                                 | Bukwang Pharmaceutical, South Korea                          |
| The Safety of Autologous Human Schwann Cells in Subjects With Chronic Spinal Cord Injury Receiving Rehabilitation                                                                                                 | NCT02354625 | This study is currently recruiting participants.                                                        | I     | 10 | 18 to 65 years | ahSC                | Autologously transplanted into the epicenter of the participant's spinal cord injury | International Standards of Neurological Classification for Spinal Cord Injury scores, MRI, neuropathic pain | W. Dalton Dietrich, The Miami Project to Cure Paralysis, USA |
| The Safety of Autologous Human Schwann Cells in Subjects With Subacute Spinal Cord Injury                                                                                                                         | NCT01739023 | This study is currently recruiting participants.                                                        | I     | 10 | 18 to 60 years | ahSC                | Autologously transplanted into the epicenter of the participant's spinal cord injury | International Standards of Neurological Classification for Spinal Cord Injury scores, MRI, neuropathic pain | W. Dalton Dietrich, The Miami Project to Cure Paralysis, USA |
| To Study the Safety and Efficacy of Autologous Bone Marrow Stem Cells in Patients With Spinal Cord Injury                                                                                                         | NCT01730183 | The recruitment status of this study is unknown because the information has not been verified recently. | I, II | 15 | 18 to 60 years | BMSC                | Intrathecal injection                                                                | Incidence of adverse events                                                                                 | Max Institute of Neurosciences, India                        |
| Treatment of Severe Adult Traumatic Brain Injury Using Bone Marrow Mononuclear Cells                                                                                                                              | NCT01575470 | This study has been completed.                                                                          | I, II | 20 | 18 to 55 years | BMMNC               | IV                                                                                   | Neurological events                                                                                         | The University of Texas Health Science Center, USA           |
