# Supplementary material for: Cellular Therapies in Trauma and Critical Care Medicine: Forging New Frontiers
Source: PubMed Central journal article supplement — Shock. 2015 Nov 15;44(6):505–23. doi: 10.1097/SHK.0000000000000482 (PMC4851225; doi:10.1097/shk.0000000000000482), 2015-11-15
Supplement: shk-44-505-s002.pdf [file shk-44-505-s002.pdf]

**Supplementary Table 2. Cellular Therapies in Organ Injury Clinical Trials**

| Official Title                                                                                                                                                                                                                      | ClinicalTrials.gov Identifier | Status                                                  | Phase | Target Enrollment | Ages               | Cell Type            | Route of Administration                                               | Primary Outcome Measure                                                                                                               | Sponsor                                                |
|-------------------------------------------------------------------------------------------------------------------------------------------------------------------------------------------------------------------------------------|-------------------------------|---------------------------------------------------------|-------|-------------------|--------------------|----------------------|-----------------------------------------------------------------------|---------------------------------------------------------------------------------------------------------------------------------------|--------------------------------------------------------|
| A Phase 1 Multi-center Clinical Trial of Allogeneic Bone Marrow-derived Human Mesenchymal Stem Cells for the Treatment of Acute Respiratory Distress Syndrome                                                                       | NCT01775774                   | This study is currently recruiting participants.        | I, II | 69                | 18 Years and older | BMMSC                | IV                                                                    | Incidence of adverse events                                                                                                           | Michael A. Matthay, USA                                |
| A Pilot Study for the Efficacy and Safety of Mesenchymal Stem Cell in Acute Severe Respiratory Failure                                                                                                                              | NCT02112500                   | This study is currently recruiting participants.        | II    | 10                | 20 to 80 years     | BMMSC (Lungcellgram) | IV                                                                    | Oxygen index at 3 days after mesenchymal stem cell infusion                                                                           | Asan Medical Center, South Korea                       |
| A Pilot Study Using Placenta Derived Decidual Stromal Cells for Toxicity and Inflammation With Special Focus to the Allogeneic Hematopoietic Cell Transplantation Setting                                                           | NCT02175303                   | This study is currently recruiting participants.        | I, II | 25                | N/A                | PDSC                 | IV                                                                    | Incidence of adverse events                                                                                                           | Karolinska Institutet, Sweden                          |
| A Randomized, Multicenter, Double-Blind, Placebo-Controlled Study of AC607 for the Treatment of Acute Kidney Injury in Cardiac Surgery Subjects                                                                                     | NCT01602328                   | This study has been terminated.                         | II    | 156               | 21 years and older | MSC                  | N/A                                                                   | Time to kidney recovery defined as a post-operative serum creatinine return to pre-operative baseline values                          | Allocure Inc., USA                                     |
| Human Umbilical Cord Mesenchymal Stem Cell Therapy for Patients With Cerebral Hemorrhage                                                                                                                                            | NCT02283879                   | This study is not yet open for participant recruitment. | I     | 20                | 40 to 80 years     | UC-MSC               | IV                                                                    | Safety evaluation through vital signs, the results of clinical lab tests and adverse events (AEs)                                     | Shenzhen Hornetcorn Biotechnology Company, LTD., China |
| Phase I Clinical Trial, Dose-escalating Intra-aortic Infusion of Allogeneic , Bone Marrow-derived Multipotent Stromal Cells to Prevent and Treat Post-operative Acute Kidney Injury in Patients Who Require On-pump Cardiac Surgery | NCT00733876                   | This study has been completed.                          | I     | 15                | 18 years and older | BMSiC                | N/A                                                                   | Incidence of adverse events                                                                                                           | Allocure Inc., USA                                     |
| Phase I Study of Allogeneic Adipose-derived Mesenchymal Stem Cells in Acute Respiratory Distress Syndrome                                                                                                                           | NCT01902082                   | This study is currently recruiting participants.        | I     | 20                | 18 to 90 years     | AdMSC                | IV                                                                    | Incidence of adverse events                                                                                                           | Shaoxing Second Hospital, China                        |
| Phase I Study of Radiation-induced Pulmonary Fibrosis Treated With Clinical Grade Umbilical Cord Mesenchymal Stem Cells                                                                                                             | NCT02277145                   | This study is currently recruiting participants.        | I     | 14                | 18 to 70 years     | UC-MSC               | Injected via bronchoscopy after fully lavage of the localized lesions | Composite indicators, including quantitative analysis of CT density histograms, self-evaluation and changes of TGF- $\beta$ 1 content | Jianwu Dai, China                                      |
| Prospective, Randomized, Multi-center Phase 2 Clinical Trial of Allogeneic Bone Marrow-derived Human Mesenchymal Stem Cells for the Treatment of Acute Respiratory Distress Syndrome                                                | NCT02097641                   | This study is currently recruiting participants.        | II    | 60                | 18 years and older | BMMSC                | IV                                                                    | Incidence of adverse events within 6 hours of infusion, cardiac arrest or death within 24 hours of infusion, any adverse events       | Michael A. Matthay, USA                                |
