# Supplementary material for: Cellular Therapies in Trauma and Critical Care Medicine: Forging New Frontiers
Source: PubMed Central journal article supplement — Shock. 2015 Nov 15;44(6):505–23. doi: 10.1097/SHK.0000000000000482 (PMC4851225; doi:10.1097/shk.0000000000000482), 2015-11-15
Supplement: shk-44-505-s003.pdf [file shk-44-505-s003.pdf]

**Supplementary Table 3. Cellular Therapies in Extremity Injury Clinical Trials**

| Official Title                                                                                                                                                                                                                         | ClinicalTrials.gov Identifier | Status                                                                                                  | Phase | Target Enrollment | Ages               | Cell Type                                                     | Route of Administration                                                | Primary Outcome Measure                                                                                                                                                   | Sponsor                                        |
|----------------------------------------------------------------------------------------------------------------------------------------------------------------------------------------------------------------------------------------|-------------------------------|---------------------------------------------------------------------------------------------------------|-------|-------------------|--------------------|---------------------------------------------------------------|------------------------------------------------------------------------|---------------------------------------------------------------------------------------------------------------------------------------------------------------------------|------------------------------------------------|
| A Multicenter, Randomized, Double-Blind, Placebo-Controlled, Parallel Group Study To Evaluate The Efficacy, Safety, And Tolerability Of Ixmyelocel-T In Subjects With Critical Limb Ischemia And No Options For Revascularization      | NCT01483898                   | This study is ongoing, but not recruiting participants.                                                 | III   | 41                | 35 to 90 years     | Ixmyelocel-T                                                  | Injection into ischemic muscle tissue                                  | Amputation free survival (i.e., time to the first occurrence of either major amputation [above the talus] in the index leg or death) at 12 months post-injection          | Vericel Corporation, USA                       |
| A Multi-Centre Phase I/II Safety and Tolerability Study Following the Infusion of Expanded Autologous Progeny of an Adult CD34 <sup>+</sup> Stem Cell Subset to Patients With Recent Tibial Fractures                                  | NCT00632034                   | The recruitment status of this study is unknown because the information has not been verified recently. | I/II  | 32                | 17 to 75 years     | CD34 <sup>+</sup> stem cell                                   | Infusion into the tibial artery                                        | Incidence of adverse events                                                                                                                                               | Imperial College London, UK                    |
| An Open-label, Non-Randomized, Patient Funded, Multi-Center Study to Assess the Safety and Effects of Autologous Adipose-Derived Stromal Cells Via Intramuscular Injections for the Treatment of Critical Limb Ischemia                | NCT02099500                   | This study is currently recruiting participants.                                                        | I/II  | 200               | 18 years and older | ASC                                                           | Injection into ischemic muscle tissue                                  | Incidence of adverse events and improvement from baseline in perfusion as measured by ankle-brachial index and collateral artery number                                   | Ageless Regenerative Institute, USA            |
| An Open-label Single Arm Phase 2 Proof of Concept Study to Assess the Efficacy and Safety of ASCT01 in Patients With Critical Limb Ischemia                                                                                            | NCT01867190                   | This study is currently recruiting participants.                                                        | I/II  | 24                | 18 to 80 years     | ASCT01                                                        | IV + injection into ischemic muscle tissue                             | Safety and efficacy with a primary endpoint of major amputation (i.e., above the ankle) or persisting critical limb ischemia (i.e., no clinical or perfusion improvement) | Lifecells, LLC., USA                           |
| A Phase 1 Clinical Study to Evaluate the Safety of Allogeneic Adipose-derived Stem Cells in the Subjects With Deep Second-degree Burn Wound                                                                                            | NCT02394873                   | This study is currently recruiting participants.                                                        | I     | 5                 | 18 years and older | ADSC                                                          | Topical dressing                                                       | Incidence of adverse events                                                                                                                                               | Anterogen Co., Ltd., South Korea               |
| A Phase I/II Study of Human Cord Blood Mononuclear Cells and Human Umbilical Cord Mesenchymal Stem Cells Transplantation in Patients With Acute Burn                                                                                   | NCT01443689                   | The recruitment status of this study is unknown because the information has not been verified recently. | I/II  | 20                | 18 to 65 years     | UC-MSC + UC-BMMNCs                                            | N/A                                                                    | Ratio of wound contraction and re-epithelialisation, healing time, Vancouver scar scale scores                                                                            | Shenzhen Beike Bio-Technology Co., Ltd., China |
| A Prospective, Multicentric, Phase I/II, Open Label, Randomized, Interventional Study to Evaluate the Safety and Efficacy of Intramuscular and Intravenous Administration of Autologous ADMSCS for Treatment of Critical Limb Ischemia | NCT02145897                   | This study is currently recruiting participants.                                                        | I/II  | 60                | 18 to 65 years     | Adipose-derived Stromal Vascular Fraction                     | Intramuscular injection                                                | Incidence of adverse events                                                                                                                                               | Kasiak Research Pvt. Ltd., India               |
| A Radiographic and Clinical Outcomes Study Evaluating map3 <sup>®</sup> Cellular Allogeneic Bone Graft in Patients Undergoing Bone Grafting in the Foot/Ankle                                                                          | NCT02161016                   | This study has been terminated.                                                                         | IV    | 1                 | 18 to 80 years     | map3 <sup>®</sup> Cellular Allogeneic Bone Graft + stem cells | N/A                                                                    | The American Orthopaedic Foot and Ankle Society (AOFAS) foot-and-ankle Score                                                                                              | RTI Biologics, USA                             |
| A Randomized, Controlled, Parallel Group, Blinded, Feasibility Study of the TGI Adipose-derived Stromal Cell (ASC)-Coated ePTFE Vascular Graft for Femoral-                                                                            | NCT01305863                   | This study is ongoing, but not recruiting                                                               | I/II  | 60                | 18 years and older | ASC                                                           | Cells are soded onto the internal lumen of the vascular graft prior to | Graft patency will be measured by duplex ultrasound                                                                                                                       | Tissue Genesis, Inc., USA                      |

|                                                                                                                                                                                                                                                                                                                                 |             |                                                         |      |    |                    |                           |                         |                                                                   |                                                                                                   |
|---------------------------------------------------------------------------------------------------------------------------------------------------------------------------------------------------------------------------------------------------------------------------------------------------------------------------------|-------------|---------------------------------------------------------|------|----|--------------------|---------------------------|-------------------------|-------------------------------------------------------------------|---------------------------------------------------------------------------------------------------|
| tibial Bypass Grafting                                                                                                                                                                                                                                                                                                          |             | participants.                                           |      |    |                    |                           | implantation            |                                                                   |                                                                                                   |
| A Randomized, Double-Blind, Controlled Study to Evaluate the Effectiveness of the Use of Bone Marrow-Derived Mesenchymal Stem Cells in Fibrin in the Treatment of Chronic Wounds                                                                                                                                                | NCT01751282 | This study is ongoing, but not recruiting participants. | I    | 66 | 18 years and older | BMMSC + fibrin spray      | N/A                     | Wound closure                                                     | Roger Williams Medical Center, USA                                                                |
| A Randomized, Double Blind, Multicentric, Placebo Controlled, Single Dose, Phase - i/ii Study Assessing the Safety and Efficacy of Intramuscular ex Vivo Cultured Adult Allogenic Mesenchymal Stem Cells in Patients With Critical Limb Ischemia                                                                                | NCT00883870 | This study has been completed.                          | I/II | 20 | 18 to 60 years     | MSC                       | Intramuscular injection | Incidence of adverse events and symptomatic relief                | Stempeutics Research Pvt Ltd., India                                                              |
| Autologous Immunomagnetic Selected cd133+ Cells in the Treatment of No-option Critical Limb Ischemia: Clinical and Ceus Assessed Results                                                                                                                                                                                        | NCT01595776 | This study has been completed.                          | I/II | 8  | 18 to 70 years     | EPC                       | Intramuscular injection | Improved contrast enhanced ultrasound                             | IRCCS Policlinico S. Matteo, Italy                                                                |
| Autologous Implantation of Mesenchymal Stem Cells for the Treatment of Distal Tibial Fractures                                                                                                                                                                                                                                  | NCT00250302 | This study has been completed.                          | I/II | 24 | 18 to 65 years     | BMMSC                     | Implantation            | Safety and number of patients reaching clinical union of fracture | Hadassah Medical Organization, Israel                                                             |
| Autologous Stem Cell Therapy for Fracture Non-union Healing                                                                                                                                                                                                                                                                     | NCT02177565 | This study has been completed.                          | N/A  | 35 | 18 to 76 years     | BMSC                      | Bone graft              | Radiological assessment of new callus and fracture bridging       | Robert Jones and Agnes Hunt Orthopaedic and District NHS Trust, UK                                |
| Cell Therapy With Mesenchymal Stem Cell in Ischemic Limb Disease                                                                                                                                                                                                                                                                | NCT02336646 | This study is currently recruiting participants.        | I    | 18 | 20 to 80 years     | BMMSC                     | Intramuscular injection | Incidence of adverse events                                       | Taiwan Bio Therapeutics Co., Ltd., Taiwan                                                         |
| Clinical Trial Phase I/II, Multicentre, Open, Randomized Study of the Use of Mesenchymal Stem Cells From Adipose Tissue (CeTMAd) as Cell Regeneration Therapy in Critical Chronic Ischemic Syndrome of Lower Limb in Nondiabetic Patients                                                                                       | NCT01745744 | This study is ongoing, but not recruiting participants. | I/II | 33 | 18 to 89 years     | AdMSC                     | IV                      | Incidence of adverse events                                       | Andalusian Initiative for Advanced Therapies - Fundación Pública Andaluza Progreso y Salud, Spain |
| Effect of Bone Marrow-derived Mesenchymal Stem Cell Transplantation in Reconstructing Human Bone Defects                                                                                                                                                                                                                        | NCT01206179 | This study has been completed.                          | I    | 6  | 12 to 75 years     | MSC                       | Injection               | Radiological union of fracture                                    | Royan Institute, Iran                                                                             |
| Effects of Adipose Tissue Derived Stem Cells Implantation in Patients With Critical Limb Ischemia                                                                                                                                                                                                                               | NCT01663376 | This study has been completed.                          | I/II | 20 | 20 to 80 years     | AdMSC                     | N/A                     | Incidence of adverse events                                       | K-Stemcell Co Ltd., South Korea                                                                   |
| Effectiveness of Adipose Tissue Derived Mesenchymal Stem Cells as Osteogenic Component in Composite Grafts Versus Acellular Bone Graft Substitutes for Augmentation in the Treatment of Proximal Humeral Fractures as Model for Fractures of Osteoporotic Bone - a Prospective Randomized First in Men Proof of Principle Trial | NCT01532076 | This study has been terminated.                         | II   | 8  | 50 years or older  | Stromal vascular fraction | Implantation            | Development of secondary dislocation                              | University Hospital, Switzerland                                                                  |
| Evaluation the Safety and Efficacy of Allogeneic Mesenchymal Stem Cell Transplantation in Tibial Closed Diaphyseal Fractures                                                                                                                                                                                                    | NCT02140528 | This study is currently recruiting participants.        | II   | 40 | 18 to 65 years     | AdMSC                     | Injection               | Number of patients with union of fracture                         | Royan Institute, Iran                                                                             |
| Evaluation the Side Effects of Repeated Bone Marrow Derived Mono Nuclear Stem Cells Transplantation in Patients With Lower Limb Ischemic Ulcer                                                                                                                                                                                  | NCT01480414 | This study has been completed.                          | I/II | 20 | 20 to 62 years     | BMMNC                     | Intramuscular injection | Incidence of adverse events                                       | Royan Institute, Iran                                                                             |
| Evaluation the Treatment of Nonunion of Long Bone                                                                                                                                                                                                                                                                               | NCT01958502 | This study is                                           | II   | 18 | 18 to 60 years     | MSC +                     | Implantation            | Clinical and radiological                                         | Emdadi Kamyab                                                                                     |

|                                                                                                                                                                                                                           |             |                                                         |        |     |                    |                             |                                       |                                                                                                                  |                                                                                                   |
|---------------------------------------------------------------------------------------------------------------------------------------------------------------------------------------------------------------------------|-------------|---------------------------------------------------------|--------|-----|--------------------|-----------------------------|---------------------------------------|------------------------------------------------------------------------------------------------------------------|---------------------------------------------------------------------------------------------------|
| Fracture of Lower Extremities (Femur and Tibia) Using Mononuclear Stem Cells From the Iliac Wing Within a 3-D Tissue Engineered Scaffold                                                                                  |             | currently recruiting participants.                      |        |     |                    | BMP2 + collagen scaffold    |                                       | union of fracture                                                                                                | Hospital, Iran                                                                                    |
| Feasibility Study for Fibroblast Autologous Skin Grafts: Biopsy of Skin Fibroblasts, Expansion in Cell Therapy Core, Topical Injection of Fibroblasts, and Subsequent Removal of Graft for Laboratory Studies             | NCT01964859 | This study is currently recruiting participants.        | I      | 20  | 18 to 65 years     | Skin fibroblasts            | Injection                             | Epidermal thickening                                                                                             | Johns Hopkins University, USA                                                                     |
| Human Craniomaxillofacial Allotransplantation                                                                                                                                                                             | NCT01889381 | This study is currently recruiting participants.        | II     | 15  | 18 to 60 years     | BM cells                    | N/A                                   | Post-operative graft survival                                                                                    | Johns Hopkins University, USA                                                                     |
| Human Upper Extremity Allotransplantation                                                                                                                                                                                 | NCT01459107 | This study is currently recruiting participants.        | II     | 30  | 18 to 69 years     | BM cells                    | N/A                                   | Post-operative graft survival                                                                                    | Johns Hopkins University, USA                                                                     |
| Intra-arterial Infusion of Autologous Bone Marrow Mononuclear Cells in Patients With Chronic Critical Limb Ischemia: a Randomized, Placebo-controlled Clinical Trial                                                      | NCT00371371 | This study has been completed.                          | I/II   | 160 | 18 years and older | BMMNC                       | IV                                    | Incidence of major amputation                                                                                    | UMC Utrecht, Netherlands                                                                          |
| MarrowStim PAD Kit for the Treatment of Critical Limb Ischemia (CLI) in Subjects With Severe Peripheral Arterial Disease (PAD)                                                                                            | NCT01049919 | This study is ongoing, but not recruiting participants. | N/A    | 152 | 21 years and older | BMAC                        | Injection into ischemic muscle tissue | Time to treatment failure (i.e., major amputation of the index limb or death)                                    | Biomet Biologics, LLC, USA                                                                        |
| Mesenchymal Stem Cells; Donor and Role in Management and Reconstruction of Nonunion Fracture                                                                                                                              | NCT01626625 | This study is currently recruiting participants.        | I      | 10  | 18 to 55 years     | MSC                         | N/A                                   | Radiological union of fracture                                                                                   | Indonesia University, Indonesia                                                                   |
| Monocentric Randomized Study for the Therapy of Critic Limb Ischemia With Bone Marrow- or Peripheral Blood-derived Stem Cells                                                                                             | NCT02454231 | This study is currently recruiting participants.        | II/III | 38  | 40 years and older | BMMNC                       | Intramuscular Injection               | Incidence of adverse events and changes in ischemic perfusion                                                    | University of Florence, Italy                                                                     |
| Mononucleotide Autologous Stem Cells and Demineralized Bone Matrix in the Treatment of Non Union/Delayed Fractures                                                                                                        | NCT01435434 | This study is not yet open for participant recruitment. | N/A    | N/A | 18 to 65 years     | MSC                         | Injection                             | Clinical and radiological union of fracture                                                                      | Hadassah Medical Organization, Israel                                                             |
| Multicenter Phase II, Randomized Open Clinical Trial on the Therapeutic Use of Intra-arterial Infusion of Autologous Bone Marrow Mononuclear Cells in Non-diabetic Patients With Critical Chronic Ischemia of Lower Limbs | NCT01408381 | This study is ongoing, but not recruiting participants. | II     | 44  | 18 to 89 years     | BMNC                        | IV                                    | Incidence of adverse events                                                                                      | Andalusian Initiative for Advanced Therapies - Fundación Pública Andaluza Progreso y Salud, Spain |
| Multicentric Study of the Autologous Bone Marrow-derived Mononuclear Cells Injection for Treatment of the Patients With Critical Lower Extremity Ischemia                                                                 | NCT01903044 | This study is not yet open for participant recruitment. | I/II   | 60  | 18 to 75 years     | BMMNC                       | Intramuscular injection               | Wound healing                                                                                                    | Pontifícia Universidade Católica do Paraná, Brazil                                                |
| Phase I, Arteriocyte Magellan MAR01 Therapy - Compartment Syndrome and Battlefield Trauma Study Protocol                                                                                                                  | NCT01837264 | This study is currently recruiting participants.        | I      | 30  | 18 to 65 years     | BMAC + PRP gel              | N/A                                   | Time to treatment failure (i.e., infection rate, wound or therapy-related complications, or amputation) or death | Arteriocyte, Inc., USA                                                                            |
| Phase I, Non-Randomized, Feasibility Study for the Use of Bone Marrow Cell Concentrate Prepared Using the Magellan System for the Treatment of Critical Limb Ischemia                                                     | NCT01386216 | This study is ongoing, but not recruiting participants. | I      | 20  | 18 to 85 years     | BMHSC concentrate + PRP gel | Intramuscular injection               | Time to treatment failure (i.e., defined as major amputation) or death                                           | Arteriocyte, Inc., USA                                                                            |

|                                                                                                                                                                                                                                             |             |                                                                                                         |      |     |                    |                                    |                         |                                                                                                                 |                                                   |
|---------------------------------------------------------------------------------------------------------------------------------------------------------------------------------------------------------------------------------------------|-------------|---------------------------------------------------------------------------------------------------------|------|-----|--------------------|------------------------------------|-------------------------|-----------------------------------------------------------------------------------------------------------------|---------------------------------------------------|
| Phase I Study of A Combination Stem Cell Therapy is Safe and Feasible in the Development of Mature Stable Vessels in Ischemic Limbs                                                                                                         | NCT00518401 | This study has been completed.                                                                          | I    | 10  | 18 years and older | MESENDO (MSC + EPC)                | Intramuscular Injection | Incidence of adverse events                                                                                     | TCA Cellular Therapy, USA                         |
| Phase II Efficacy Study of Intramuscular Autologous Bone Marrow Mononuclear Cells Plus Mesenchymal Stem Cell Implantation Versus Autologous Bone Marrow Mononuclear Cells Implantation Only in Patients With Chronic Critical Limb Ischemia | NCT01456819 | This study is currently recruiting participants.                                                        | II   | 50  | 20 years and older | BMMSC                              | Intramuscular injection | Change in angiogenesis as measured by peripheral pulses, capillary refill, and transcutaneous oxygen saturation | National University of Malaysia, Malaysia         |
| Phase II Safety/Efficacy Study of A Combination Stem Cell Therapy That Develops Mature Stable Vessel Formation in Ischemic Limbs                                                                                                            | NCT00721006 | This study has been completed.                                                                          | II   | 35  | 19 years and older | MESENDO (MSC + EPC)                | Subcutaneous injections | Enhancement of vessel formation accessed by Nuclear Perfusion Scan                                              | TCA Cellular Therapy, USA                         |
| Pivotal Study of the Safety and Effectiveness of Autologous Bone Marrow Aspirate Concentrate (BMAC) for the Treatment of Critical Limb Ischemia Due to Peripheral Arterial Disease                                                          | NCT01245335 | This study is ongoing, but not recruiting participants.                                                 | III  | 210 | 18 years and older | BMAC                               | Intramuscular injection | Amputation free survival time                                                                                   | Harvest Technologies, USA                         |
| Potency of Allogenic Bone Marrow, Umbilical Cord, Adipose Mesenchymal Stem Cell for Non Union Fracture and Long Bone Defect, Directly and Cryopreserved                                                                                     | NCT02307435 | This study is currently recruiting participants.                                                        | 0    | 9   | 19 to 30 years     | AdMSC, BMMSC, + AdMSC              | Implantation            | Cell viability                                                                                                  | Indonesia University, Indonesia                   |
| Stem Cell Therapy to Improve Burn Wound Healing                                                                                                                                                                                             | NCT02104713 | This study is currently recruiting participants.                                                        | I    | 20  | 18 years and older | MSC                                | N/A                     | Incidence of adverse events (i.e., blistering, inflammation, and rash)                                          | Dr. E. Badiavas, USA                              |
| The Combined Effect of Mesenchymal Stem Cell, HA-CaSO4,BMP-2, and Implant in Inducing The Healing of Critical-Sized Bone Defect                                                                                                             | NCT01725698 | The recruitment status of this study is unknown because the information has not been verified recently. | I    | 5   | 17 to 65 years     | MSC, HA-CaSO <sub>4</sub> ,+ BMP-2 | N/A                     | Radiological union scale (RUST Score) as a measure of bone union                                                | Indonesia University, Indonesia                   |
| The Efficacy of Mesenchymal Stem Cells for Stimulate the Union in Treatment of Non-united Tibial and Femoral Fractures in Shahid Kamyab Hospital                                                                                            | NCT01788059 | This study has been completed.                                                                          | II   | 19  | 18 to 60 years     | MSC                                | Intramuscular injection | Clinical and radiological union of fracture                                                                     | Emdadi Kamyab Hospital, Iran                      |
| The Pittsburgh Protocol in Human Upper Extremity Allotransplantation                                                                                                                                                                        | NCT00722280 | This study is currently recruiting participants.                                                        | N/A  | 300 | 18 to 60 years     | BMSCs                              | N/A                     | Graft survival                                                                                                  | University of Pittsburgh, USA                     |
| The Use of Autogenous Adult Stem Cells in the Treatment of Critical Ischemia                                                                                                                                                                | NCT00488020 | The recruitment status of this study is unknown because the information has not been verified recently. | I    | 10  | 30 to 80 years     | BMNC                               | Intramuscular injection | Improved pain and healing of ischemic ulcers                                                                    | Instituto de Molestias Cardiovasculares, Brazil   |
| Treatment of Atrophic Nonunion Fractures by Autologous Mesenchymal Stem Cell Percutaneous Grafting. A Randomized, Double-blind, Controlled Study                                                                                            | NCT01429012 | This study is not yet open for participant recruitment.                                                 | II   | 40  | 18 years and older | MSC                                | Injection               | Incidence of adverse events and proportion of patients that develop a partial or complete callus                | University Hospital of Liege, Belgium             |
| Treatment of Long Bone Nonunion With Autologous Bone Marrow Stem Cells                                                                                                                                                                      | NCT01581892 | The recruitment status of this study is unknown because the information has                             | I/II | 30  | 18 years and older | Mononuclear stem cells             | Implantation            | Incidence of adverse events                                                                                     | Hospital Universitario Central de Asturias, Spain |

|                                                                                                                                                                                |             |                                                                                                         |        |    |                    |                |                        |                                                                                                                                  |                                     |
|--------------------------------------------------------------------------------------------------------------------------------------------------------------------------------|-------------|---------------------------------------------------------------------------------------------------------|--------|----|--------------------|----------------|------------------------|----------------------------------------------------------------------------------------------------------------------------------|-------------------------------------|
| Treatment of Refractory Non-union Fractures by Pre-osteoblast Cells Grafting: A Pilot Study                                                                                    | NCT00916981 | not been verified recently.<br>This study has been completed.                                           | I/II   | 30 | 18 years and older | BMSC           | Injection              | Radiological union of fracture                                                                                                   | Jean-Philippe Hauzeur, Belgium      |
| Treatment of Severe Limb Ischemia With Autologous Bone Marrow Derived Mononuclear Cells                                                                                        | NCT00442143 | The recruitment status of this study is unknown because the information has not been verified recently. | I      | 10 | 20 to 85 years     | BMMSC          | Implantation           | Improvement in transcutaneous oxygen pressure, 1 <sup>st</sup> toe blood pressure, ankle blood pressure, wound healing, and pain | Odense University Hospital, Denmark |
| Use of Autologous Bone Marrow Derived Mesenchymal Stromal Cells in Combination With Platelet Lysate Product for Human Long Bone Nonunion Treatment, A Phase 2-3 Clinical Trial | NCT02448849 | This study is currently recruiting participants.                                                        | II/III | 60 | 18 to 65 years     | BMMSC + BMSStC | Percutaneous injection | Clinical and radiological union of fracture                                                                                      | Royan Institute, Iran               |
| Use of Autologous Platelet Rich Plasma (PRP) Gel as an Adjunct to the Treatment of Deep 2nd and 3rd Degree Burns                                                               | NCT01843686 | This study is currently recruiting participants.                                                        | I      | 42 | 18 to 86 years     | PRP gel        | Cutaneous application  | Safety and incidence of adverse events                                                                                           | Arteriocyte, Inc., USA              |
